# Supplementary material for: Interleukin-27 is antiviral at the maternal-fetal interface.
Source: Research Square preprint supplement (doi:10.21203/rs.3.rs-6513464/v1), 2025-06-05
Supplement: Supplementary file [file 475f1384f31f3dca8f9f8a73.pdf]

**Supplemental Figure 1: Validation of first trimester TO and DO cultures**

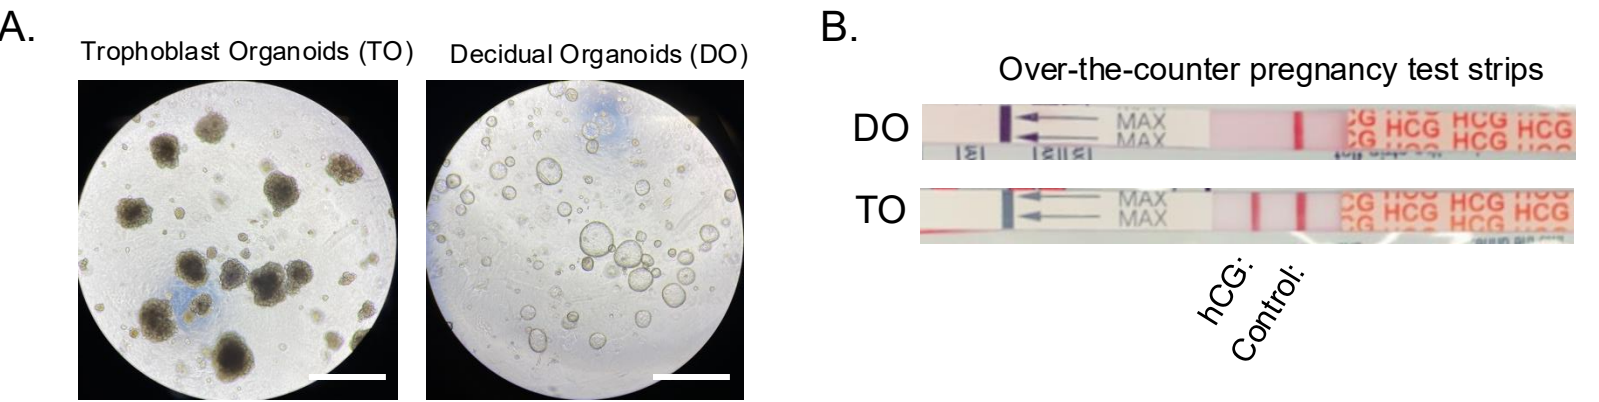

**Supplemental Figure 1. Validation of first trimester TO and DO cultures**

- A.** Representative brightfield images of TOs and DOs in culture. 5X magnification. Scale bar, 100µm.
- B.** Over the counter pregnancy test strips were used to detect secreted trophoblast-specific hormone hCG in TO- and DO-conditioned media.

**Supplemental Figure 2: ZIKV infection of TO cultures**

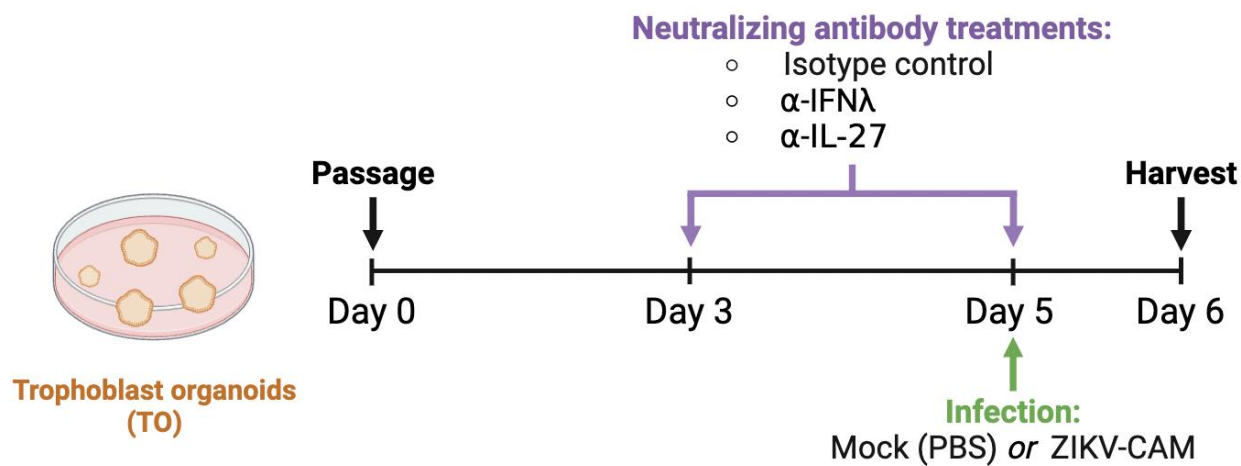

**Supplemental Figure 2. ZIKV infection of TO cultures**

**A.** Schematic of experimental design for TO infection with Cambodian ZIKV (ZIKV-CAMB) as quantified in **Figure 1E**. Graphics were created with Biorender.com.

**Supplemental Figure 3. Bulk RNA-sequencing of TOs**

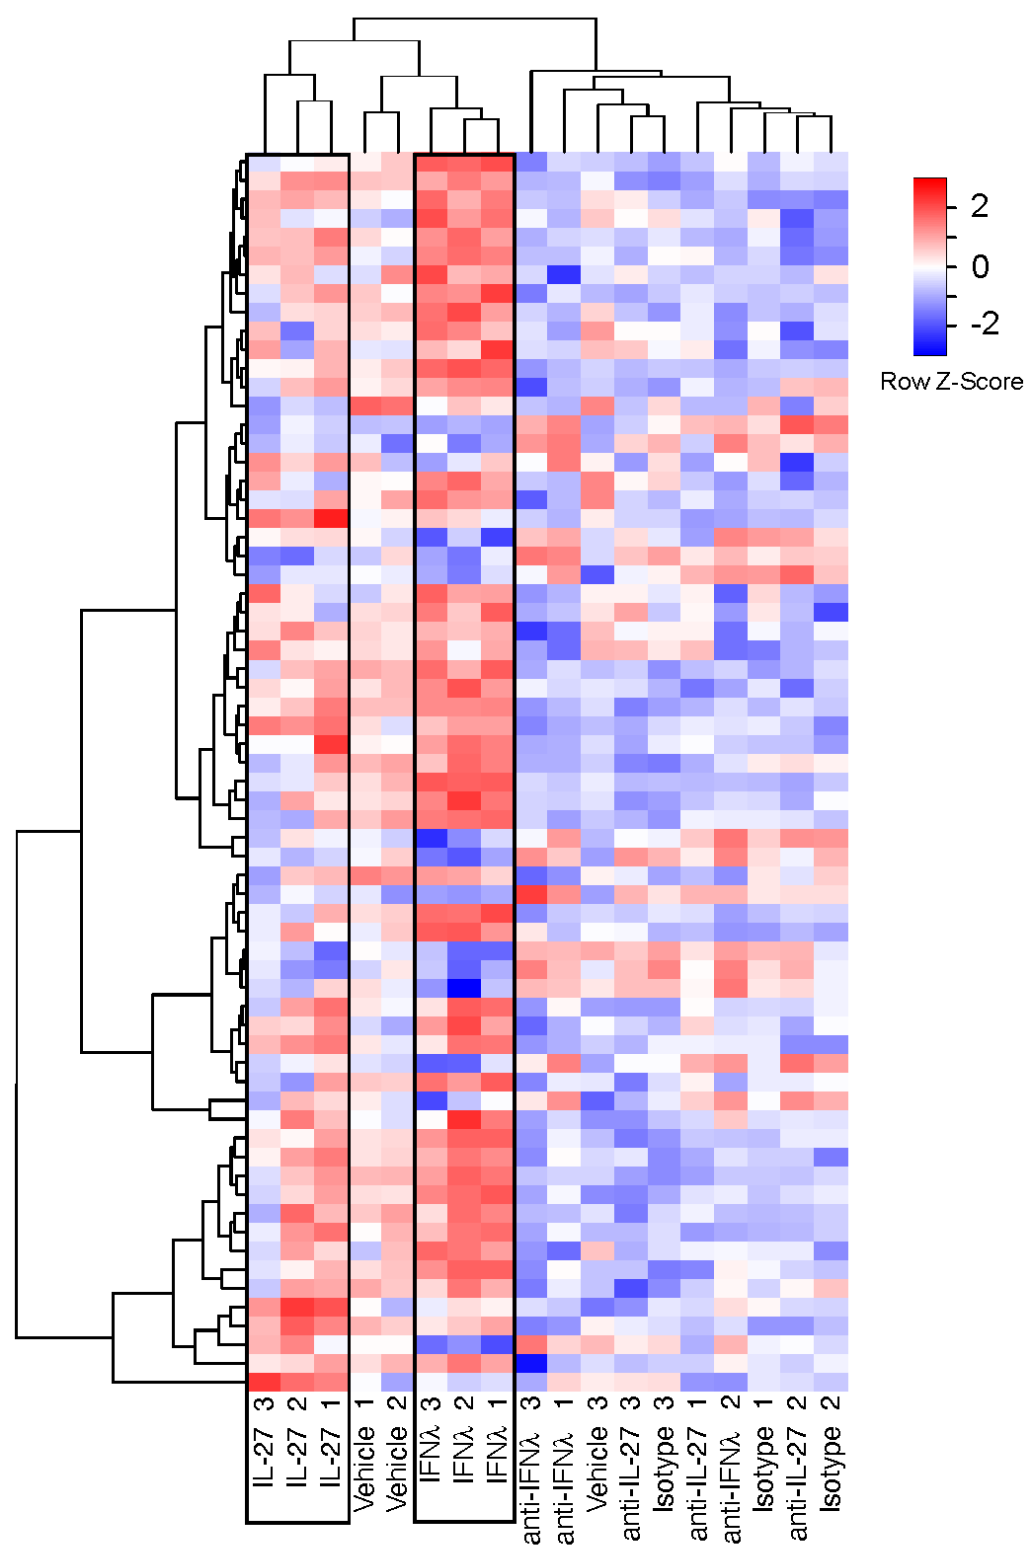

**Supplemental Figure 3. Bulk RNA-sequencing of TOs**

**A.** Heat map depicts gene expression data scaled by z-score for each row from bulk RNA sequencing of TOs. Columns represent samples clustered using Spearman correlation, and rows represent differentially expressed genes that were identified by comparing IL-27-stimulated to IL-27-neutralized TOs and IFNλ-stimulated to IFNλ-neutralized TOs, then clustered using Pearson correlation. 66 genes in the heatmap met cutoffs of p-value=0.05 and log fold-change=±0.5 and are listed in **Supplemental Table 2**. Data are representative of 3 independent samples per condition.

**Supplemental Figure 4. p28 production within the murine labyrinth**

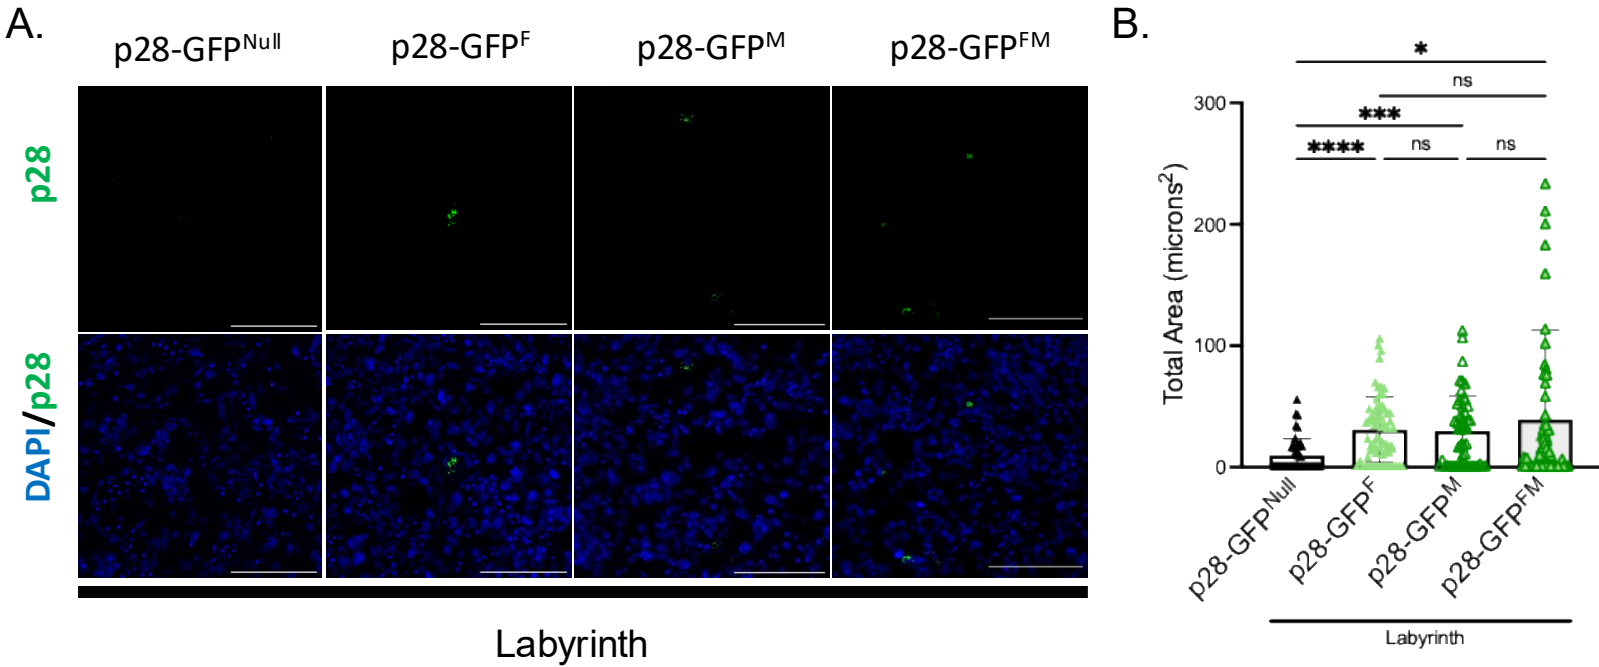

**Supplemental Figure 4. p28 production within the murine labyrinth**

**A.** p28-GFP localization within murine placental labyrinth at E13.5. 10μm placental cross-sections were stained with anti-GFP (green) and DAPI (blue) and imaged via microscopy. Representative images from 4 independent placentas. 20X magnification. Scale bar, 100μm.

**B.** Quantification of total labyrinth p28-GFP signal area (microns<sup>2</sup>), as shown in **Figure 3E**, adjusted for scale. Graph represents measurements from 2-4 independent placentas per group, with 3-4 cross-sections obtained per placenta, and 4-8 images acquired per cross-section. Statistical analysis performed with Kruskal-Wallis ANOVA, \*p<0.05, \*\*p <0.001, \*\*\*\*p<0.0001.

**Supplemental Figure 5. IL-27 signaling limits fetal pathology during murine congenital ZIKV infection**

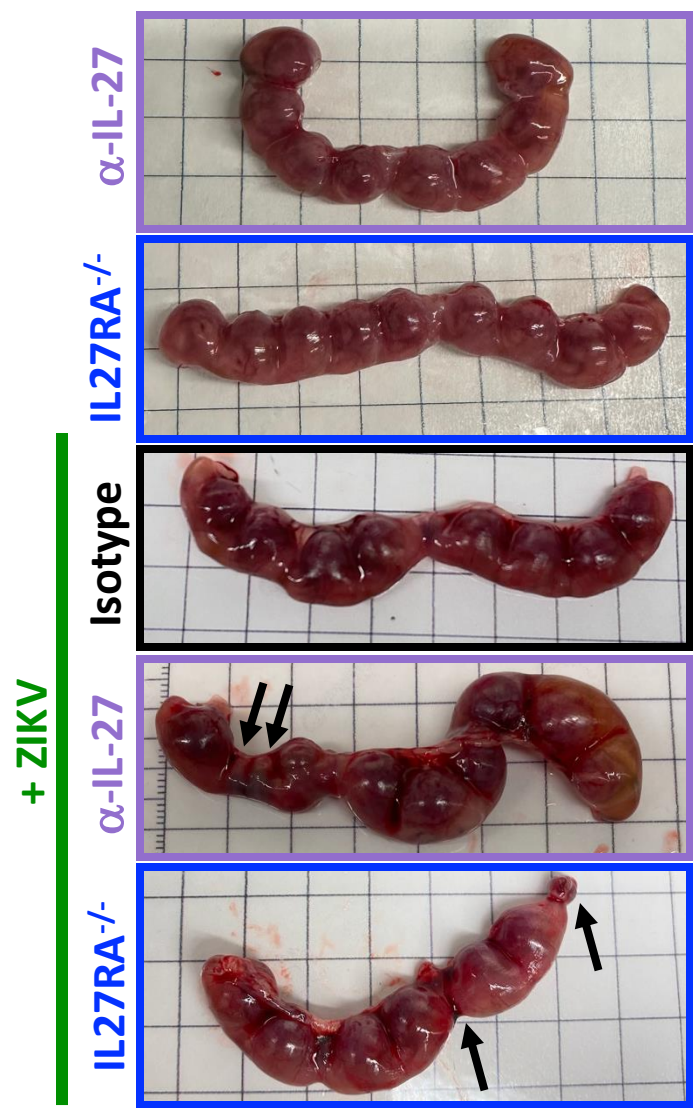

**Supplemental Figure 5. IL-27 signaling limits fetal pathology during murine congenital ZIKV infection**

**A.** Representative images of murine uterine horns isolated at E13.5 for tissue pathology and viral burden analyses. Black arrows highlight embryos exhibiting pathologic fetal outcomes.
